# Supplementary figures and images for: Mechanical regulation of nerve stem cells' multiple behaviors via GHz acoustic streaming
Source: Royal Society of Chemistry journal article supplement (doi:10.1039/d4lc00867g), 2025-01-01

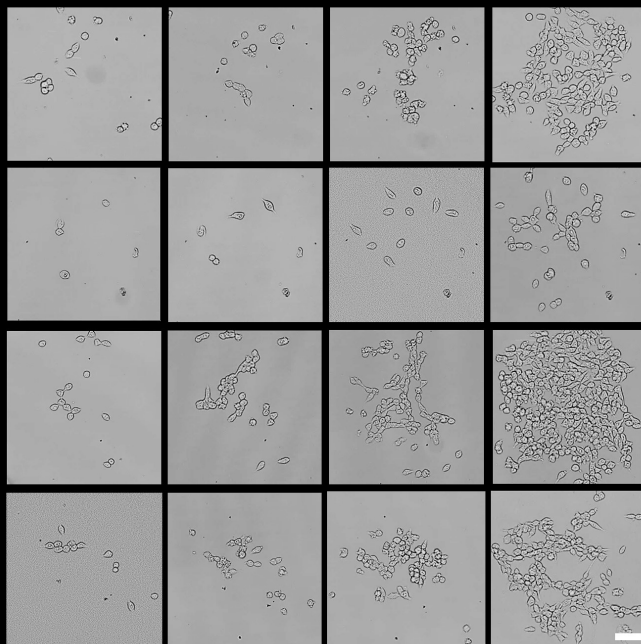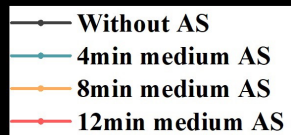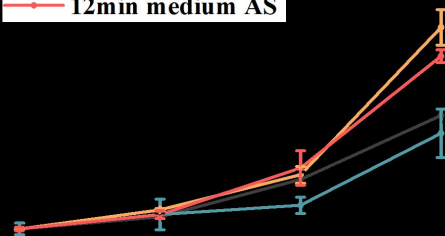

Supplement: d4lc00867g8.pdf [file d4lc00867g8.pdf]
